# Supplementary material for: Perylene dye-functionalized silver nanoparticles serving as pH-dependent metal sensor systems
Source: Royal Society of Chemistry journal article supplement (doi:10.1039/c7ra03264a), 2017-01-01
Supplement: c7ra03264a1.pdf [file c7ra03264a1.pdf]

## Supporting Information

### Perylene Dye-Functionalized Silver Nanoparticles Serving as pH- Dependent Metal Sensor Systems

*Yan Sun\**, *Tongfei Zuo*, *Fang Guo*, *Jing Sun*, *Ziwei Liu*, and *Guowang Diao\**

College of Chemistry and Chemical Engineering, Yangzhou University, 225002

E-mail: sunyan@yzu.edu.cn, gw-diao@yzu.edu.cn

|                      |             |
|----------------------|-------------|
| 1. Figure S1.....    | S2          |
| 2. Figure S2.....    | S3          |
| 3. Figure S3.....    | S4          |
| 4. Figure S4.....    | S5          |
| 5. Figure S5.....    | S6          |
| 6. Figure S6.....    | S7          |
| 7. Figure S7.....    | S8          |
| 8. Figure S8.....    | S9          |
| 9. Figure<br>S9..... | S10         |
| 10. Figure<br>.....  | S10.<br>S11 |
| 11. Figure<br>.....  | S11.<br>S12 |

12. Figure

S12.

.....S13

13. Figure

S13.

.....S14

### UV-vis spectra sample preparation

AgNO<sub>3</sub> (0.5 mL, 10 mM) was added into the solution of LPL (20.0 mL, 7.5 μM) at given pH (12.6, 12.0, 11.0, and 10.0). Subsequently, a fresh NaBH<sub>4</sub> solution (0.5 mL, 0.1 M) was added into the solution with rapid stirring.

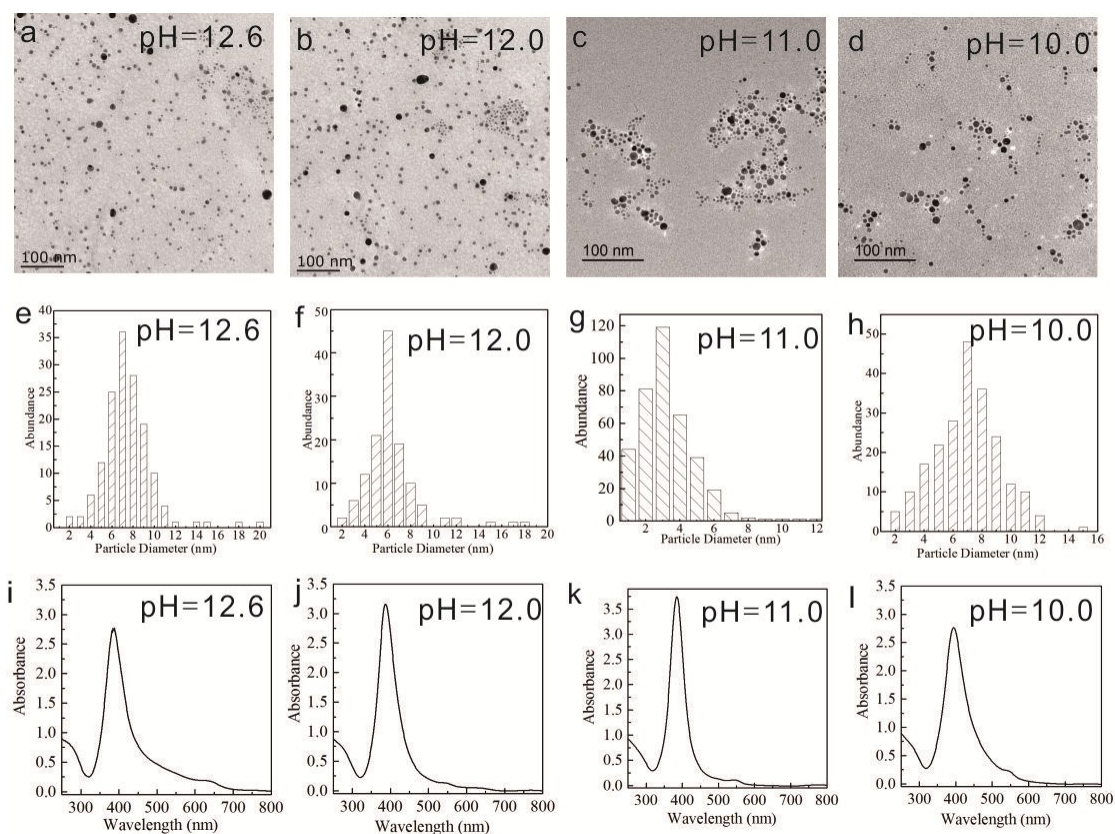

**Figure S1.** TEM images of the LPL-AgNPs at pH (a) 12.6, (b) 12.0, (c) 11.0, and (d) 10.0. (e)-(h)

Histograms of the size distribution and (i)-(j) corresponding UV-vis spectra.

### UV-vis spectra sample preparation

2.8 mL LPL ( 7.5  $\mu$ M, pH=12.6) and 0.7 mL metal ions ( 10  $\mu$ M, pH=7) were mixed for 20 min, then the UV-vis spectra were recorded.

2.8 mL LPL ( 7.5  $\mu$ M, pH=12.0) and 0.7 mL metal ions ( 50  $\mu$ M, pH=7) were mixed for 20 min, then the UV-vis spectra were recorded.

2.8 mL LPL ( 7.5  $\mu$ M, pH=11.0) and 0.7 mL metal ions ( 10  $\mu$ M, pH=7) were mixed for 20 min, then the UV-vis spectra were recorded.

2.8 mL LPL ( 7.5  $\mu$ M, pH=12.0) and 0.7 mL metal ions ( 0.5  $\mu$ M, pH=7) were mixed for 20 min, then the UV-vis spectra were recorded.

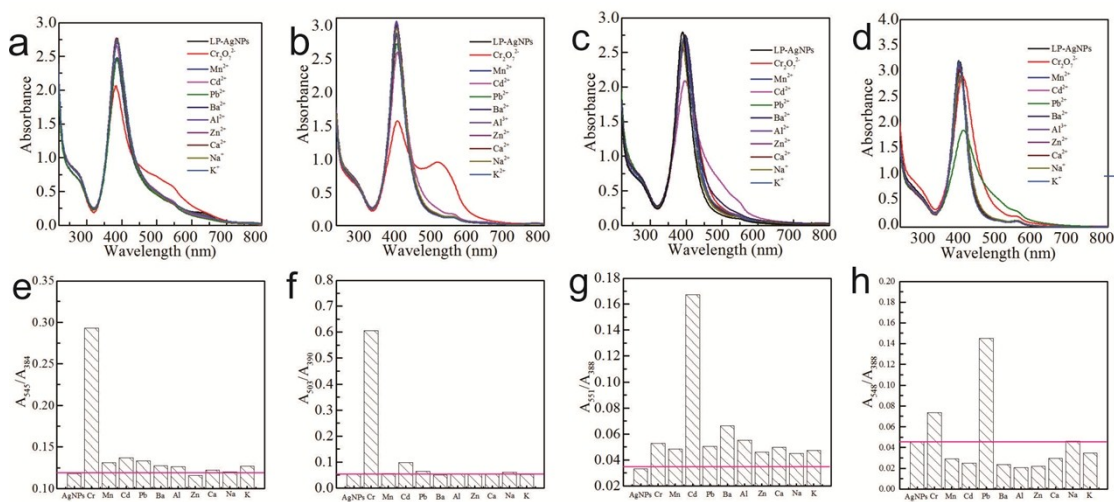

**Figure S2.** (a) UV-vis spectra of the LPL-AgNPs after the addition of different metal ions

(100 nM) at pH=12.6, (b) UV-vis spectra of the **LPL-AgNPs** after the addition of different metal ions (2  $\mu\text{M}$ ) at pH=12.0. (c) UV-vis spectra of **the LPL-AgNPs** after the addition of different metal ions (10  $\mu\text{M}$ ) at pH=11.0. (d) UV-vis spectra of **LPL-AgNPs** after the addition of different metal ions (2  $\mu\text{M}$ ) at pH=10.0. (e) Corresponding values of  $A_{545}/A_{384}$  (pH=12.6), (f) values of  $A_{503}/A_{390}$  (pH=12.0), (i) values of  $A_{551}/A_{388}$  (pH=11.0), (i) values of  $A_{551}/A_{388}$  (pH=10.0).

### UV-vis spectra sample preparation

2.4 mL LPL ( 7.5  $\mu\text{M}$ , pH=12.6) and 0.6 mL metal ions ( 100  $\mu\text{M}$ , pH=7) were mixed, then the UV-vis spectra evolution were recorded.

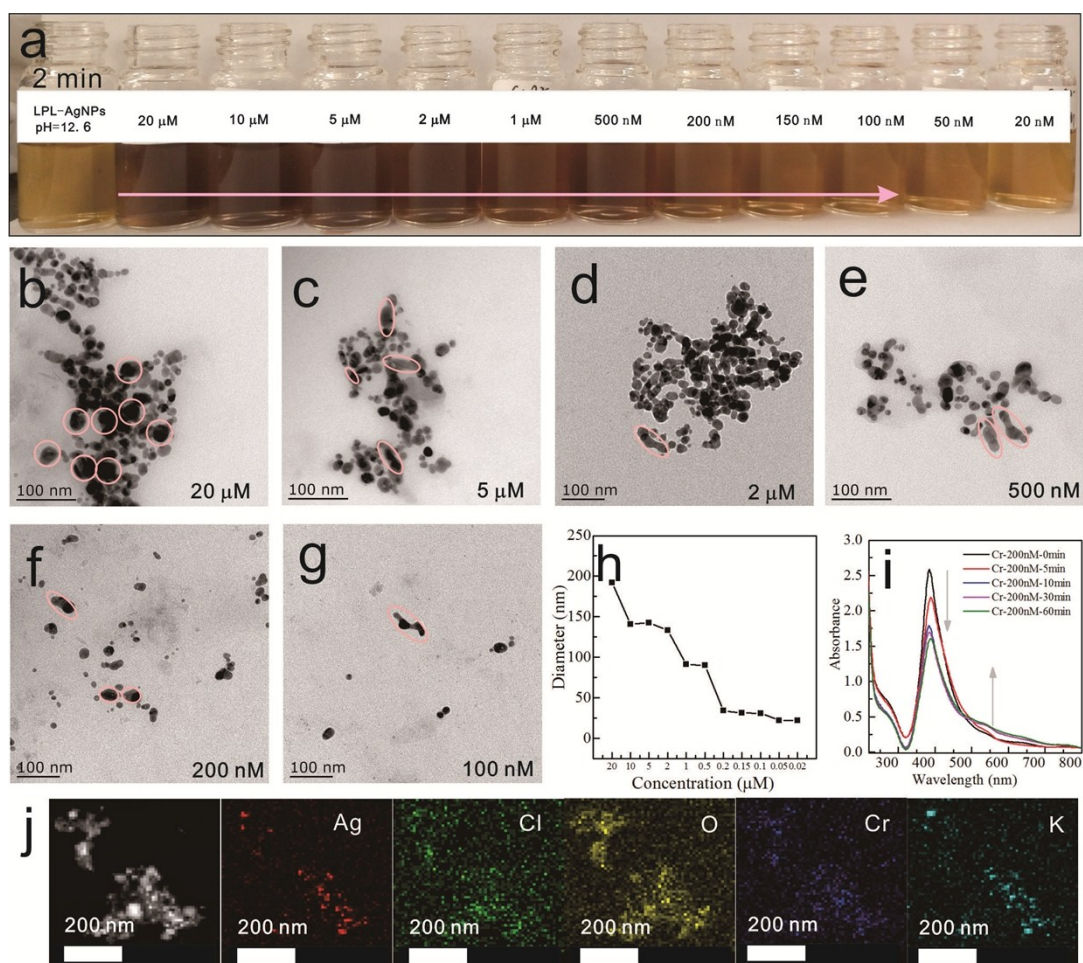



**Figure S3.** (a) Digital image of **LPL-AgNPs** interacting with different concentrations of  $\text{Cr}^{6+}$ . (b)-(g) TEM images of the **LPL-AgNPs** after interacting with  $\text{Cr}^{6+}$  at concentrations of 10  $\mu\text{M}$ , 2  $\mu\text{M}$ , 200 nM, and 100 nM. (h) Evolution of the diameter of the **LPL-AgNPs**. (i) UV-vis spectra of the **LPL-AgNPs** with time. (j) Left: STEM image of the **LPL-AgNPs**- $\text{Cr}^{6+}$ . Right: The corresponding mapping images.

### UV-vis spectra sample preparation

2.4 mL LPL (7.5  $\mu\text{M}$ , pH=11.0) and 0.6 mL metal ions (100  $\mu\text{M}$ , pH=7) were mixed, then the UV-vis spectra evolution were recorded.

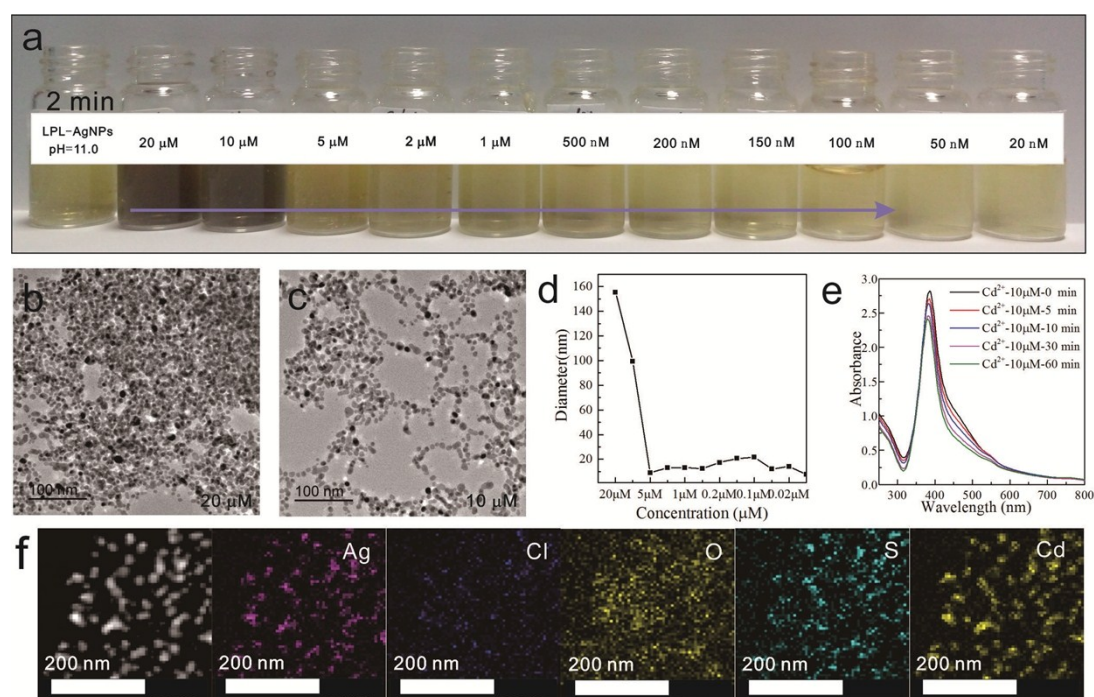

**Figure S4.** (a) Digital image of **LPL-AgNPs** interacting with  $\text{Cd}^{2+}$ . (b-c) TEM images of the **LPL-AgNPs** after interacting with  $\text{Cd}^{2+}$  at concentrations of 20  $\mu\text{M}$  and 10  $\mu\text{M}$ . (d) Evolution of the diameter of the **LPL-AgNPs**. (e) UV-vis spectra of the **LPL-AgNPs** with time. (f) Left: STEM image of the **LPL-AgNPs**- $\text{Cd}^{2+}$ . Right: The corresponding mapping images.

## UV-vis spectra sample preparation

2.4 mL LPL (7.5  $\mu\text{M}$ , pH= 10.0) and 0.6 mL metal ions (100  $\mu\text{M}$ , pH=7) were mixed, then the UV-vis spectra evolution were recorded.

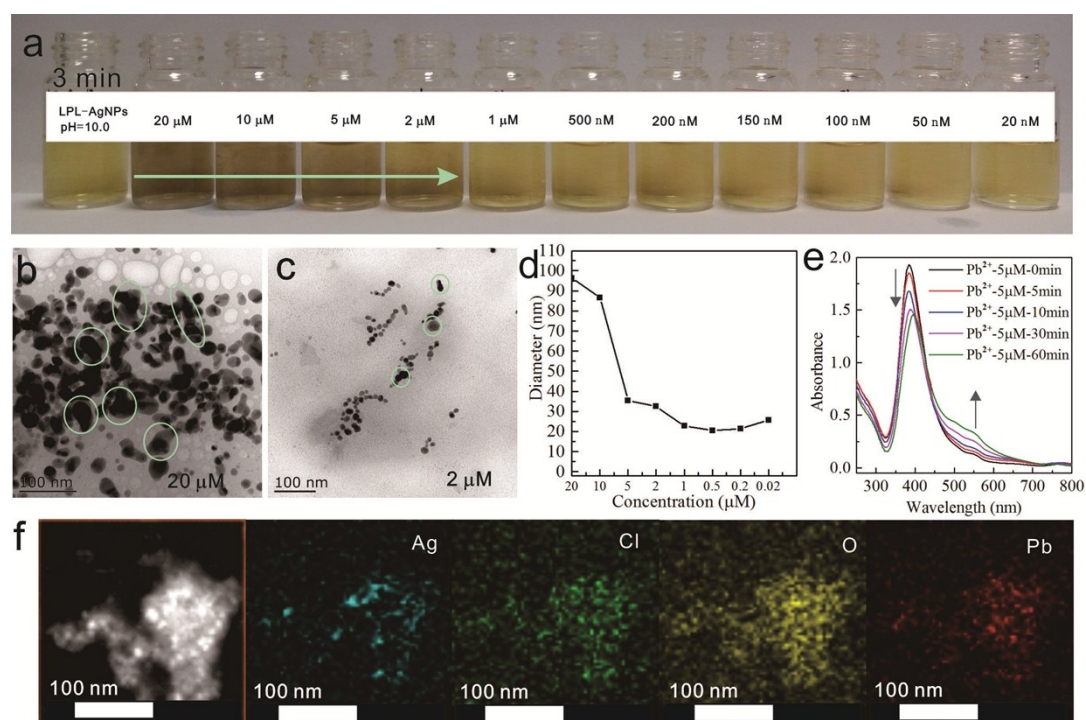

**Figure S5.** (a) Digital image of LPL-AgNPs interacting with different concentrations of  $\text{Pb}^{2+}$ . (b)-(c) TEM images of LPL-AgNPs after interacting with  $\text{Pb}^{2+}$  at the concentrations of 20  $\mu\text{M}$  and 2  $\mu\text{M}$ . (d) Evolution of the diameter of the LPL-AgNPs with the concentration. (e) UV-vis spectra of LPL-AgNPs with time. (f) Left: STEM image of the LPL-AgNPs- $\text{Pb}^{2+}$ . Right: The corresponding mapping images.

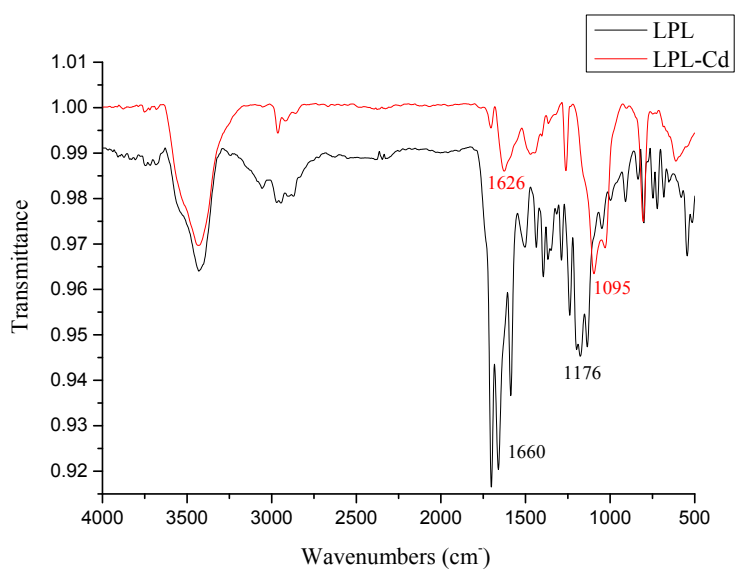

Figure S6. FT-IR spectra of LPL before and after the addition of Cd<sup>2+</sup>.

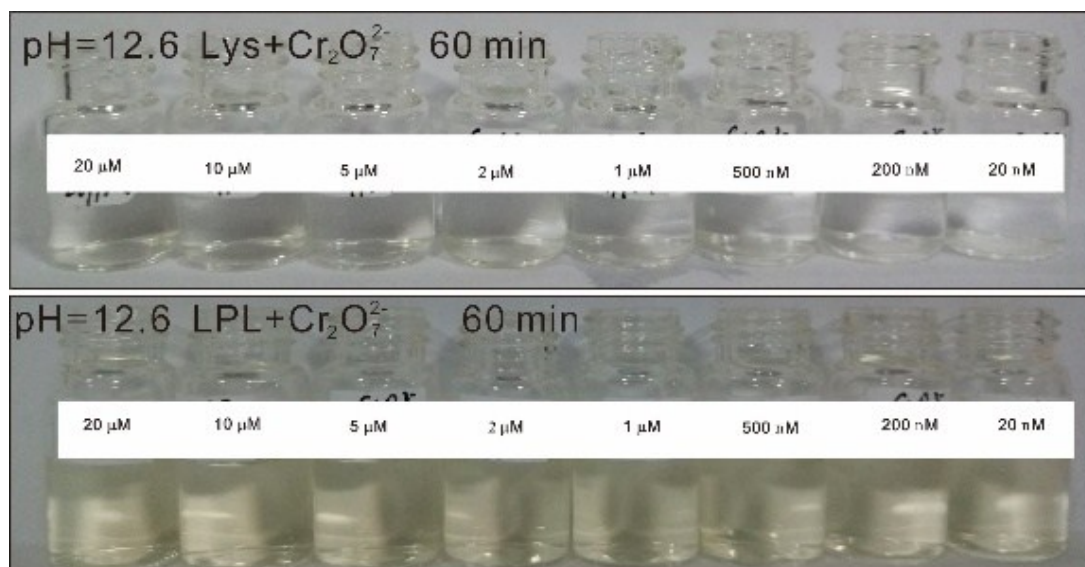

**Figure S7.** (Top) Digital image of the Lys interactions with different concentrations of  $\text{Cr}_2\text{O}_7^{2-}$  (pH=12.6). (Bottom) Digital image of the **LPL** interactions with different concentrations of  $\text{Cr}_2\text{O}_7^{2-}$  (pH=12.6).



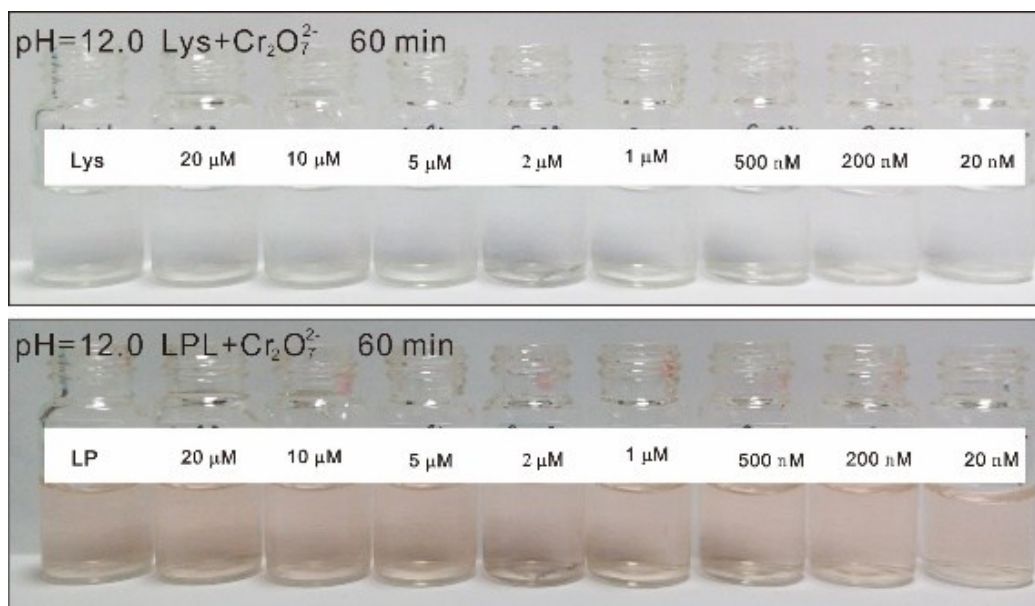

**Figure S8.** (Top) Digital image of the Lys interactions with different concentrations of Cr<sub>2</sub>O<sub>7</sub><sup>2-</sup> (pH=12.0). (Bottom) Digital image of the LPL interactions with different concentrations of Cr<sub>2</sub>O<sub>7</sub><sup>2-</sup> (pH=12.0).

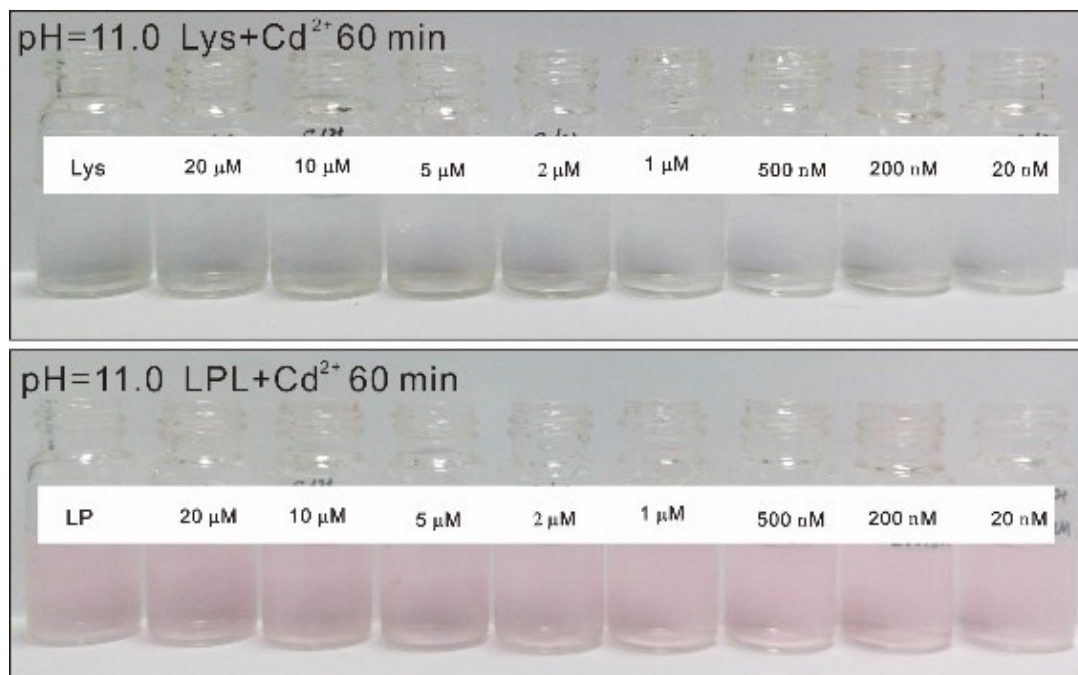

**Figure S9.** (Top) Digital image of Lys interactions with different concentrations of Cd<sup>2+</sup> (pH=11.0). (Bottom) Digital image of the **LPL** interactions with different concentrations of Cd<sup>2+</sup> (pH=11.0).

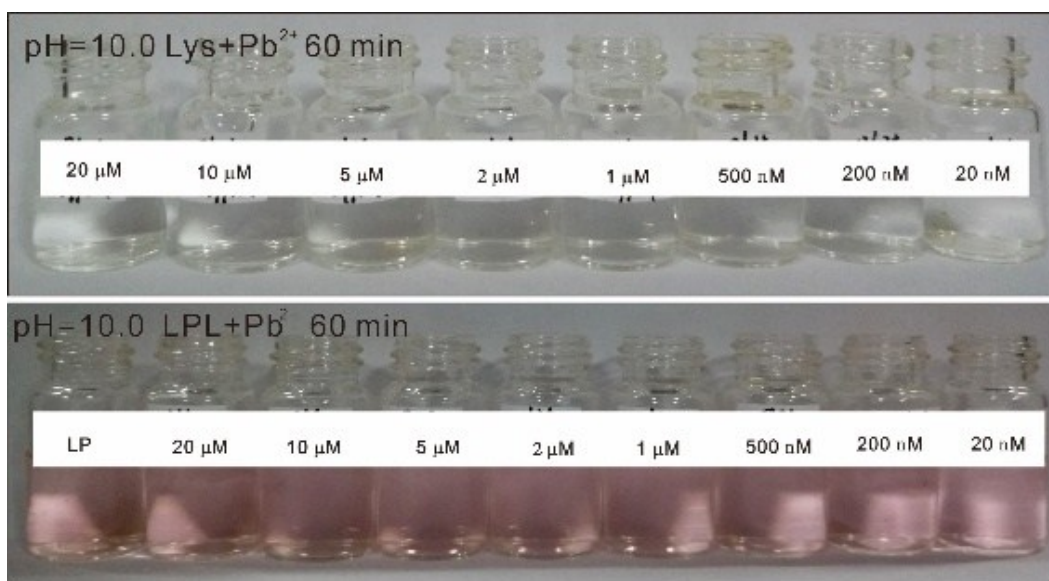

**Figure S10.** (Top) Digital image of the Lys with different concentrations of Pb<sup>2+</sup> (pH=10.0). (Bottom) Digital image of the **LPL** interactions with different concentrations of Pb<sup>2+</sup> (pH=10.0).

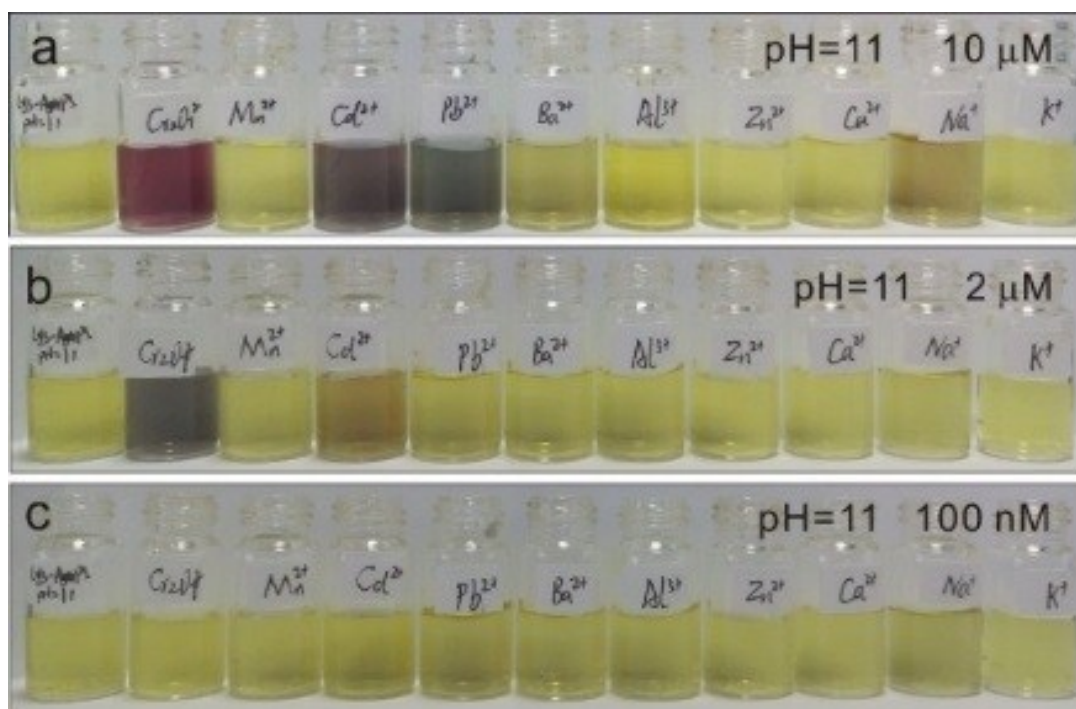

**Figure S11.** Digital images of the lysine-AgNPs with different metal ions at pH=11.0 with concentrations of (a) 10  $\mu\text{M}$ , (b) 2  $\mu\text{M}$ , and (c) 100 nM.

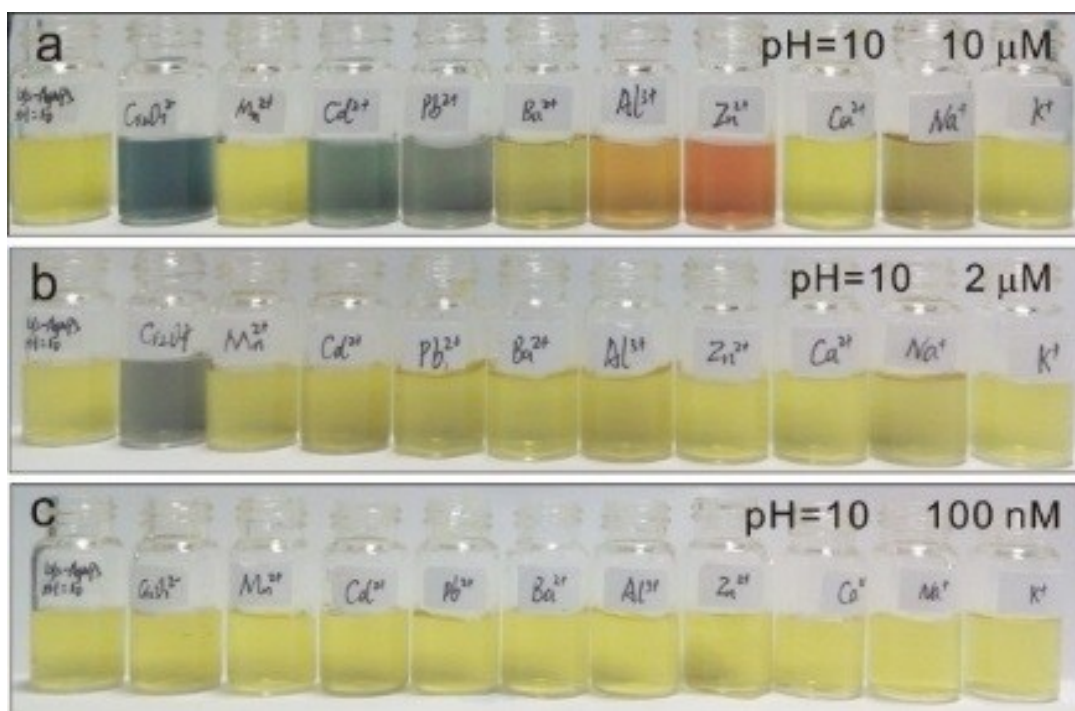

**Figure S12.** Digital images of the lysine-AgNPs with different metal ions at pH=10.0 with concentrations of (a) 10  $\mu\text{M}$ , (b) 2  $\mu\text{M}$ , and (c) 100 nM.



## Fluorescence spectra sample preparation

**pH=12.6. LPL-AgNPs-Cr<sup>6+</sup>.** 1.6mL LPL (7.5  $\mu$ M, pH=12.6) and 0.4 mL metal ions (0.5 $\mu$ M, pH=7) were mixed, then the fluorescence spectra were recorded. **LPL-AgNPs.** 1.6mL LPL-AgNPs (pH=12.6) and 0.4 mL water (0.5 $\mu$ M, pH=7) were mixed, then the fluorescence spectra were recorded. **LPL.** 1.6mL LPL (7.5  $\mu$ M, pH=12.6) and 0.4 mL water (0.5 $\mu$ M, pH=7) were mixed, then the fluorescence spectra were recorded.

**pH=12.0. LPL-AgNPs-Cr<sup>6+</sup>.** 1.6mL LPL (7.5  $\mu$ M, pH=12.0) and 0.4 mL metal ions (10 $\mu$ M, pH=7) were mixed, then the fluorescence spectra were recorded. **LPL-AgNPs.** 1.6mL LPL-AgNPs (pH=12) and 0.4 mL water were mixed, then the fluorescence spectra were recorded. **LPL.** 1.6mL LPL (7.5  $\mu$ M, pH=12) and 0.4 mL water were mixed, then the fluorescence spectra were recorded.

**pH=11.0. LPL-AgNPs-Cd<sup>2+</sup>.** 1.6mL LPL (7.5  $\mu$ M, pH=11.0) and 0.4 mL metal ions (50 $\mu$ M, pH=7) were mixed, then the fluorescence spectra were recorded. **LPL-AgNPs.** 1.6mL LPL-AgNPs (pH=11.0) and 0.4 mL water were mixed, then the fluorescence spectra were recorded. **LPL.** 1.6mL LPL (7.5  $\mu$ M, pH=11.0) and 0.4 mL water were mixed, then the fluorescence spectra were recorded.

**pH=10.0. LPL-AgNPs-Pb<sup>2+</sup>.** 1.6mL LPL (7.5  $\mu$ M, pH=10.0) and 0.4 mL metal ions (10 $\mu$ M, pH=7) were mixed, then the fluorescence spectra were recorded. **LPL-AgNPs.** 1.6mL LPL-AgNPs (pH=10.0) and 0.4 mL water were mixed, then the fluorescence spectra were recorded. **LPL.** 1.6mL LPL (7.5  $\mu$ M, pH=10.0) and 0.4 mL water were mixed, then the fluorescence spectra were recorded.

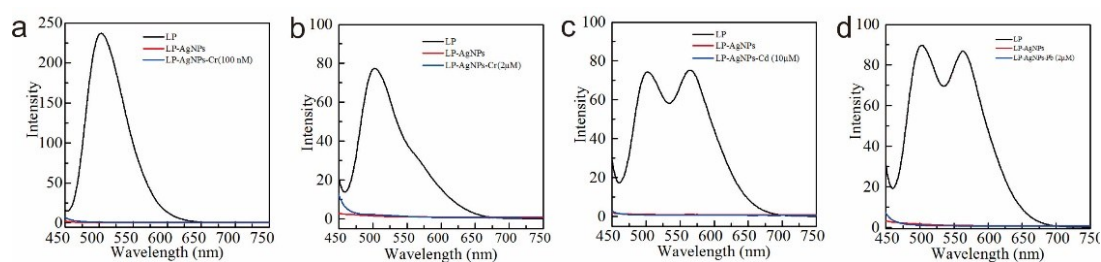

**Figure S13.** Fluorescence spectra of the LPL, LPL-AgNPs, and LPL-AgNPs-M at (a) pH=12.6, (b) pH=12.0, (c) pH=11.0, and (d) pH=10.0.

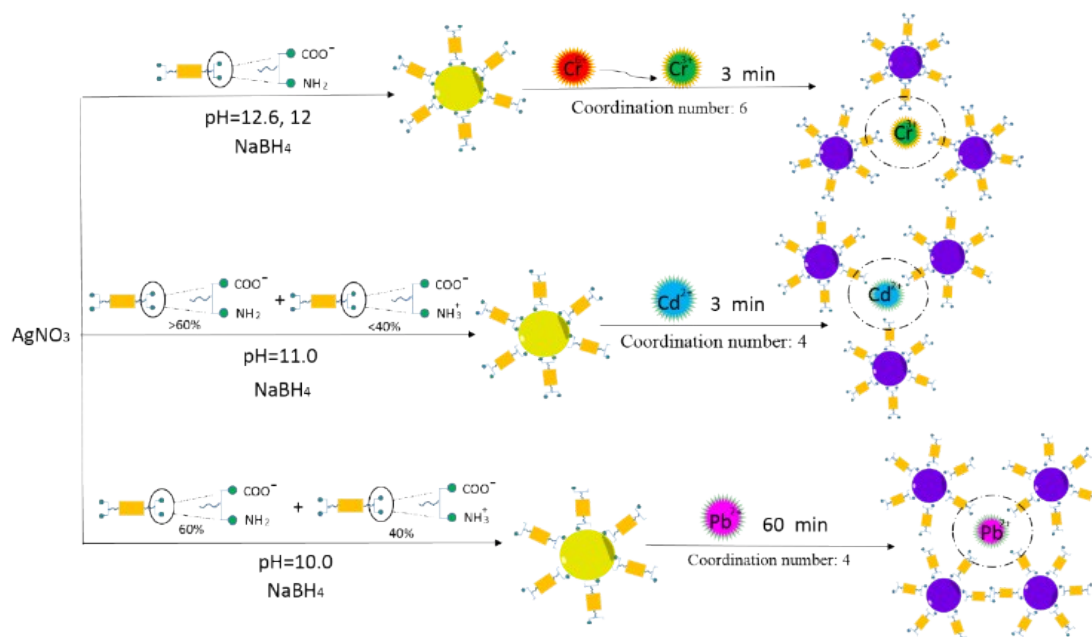

**Figure S14.** Possible mechanisms of the interactions between the metal ions and LPL-AgNPs. The ratio (>60%, and <40% at pH=11.0) was calculated based on the literature.
